# Supplementary material
Source: PubMed Central journal article supplement (PMC1721443)
Supplement: archdischfn_fetalneonatal;87_2_F128__1.pdf [file archdischfn_fetalneonatal%3B87_2_F128__1.pdf]

Table Number of children with abnormal scores for various outcomes measures

| Behaviour outcome measure | Cut off for abnormal score <sup>1</sup><br>male/female | < 2000g<br>n(%) | >3000g<br>n(%) | OR (95% CI)<br>Unadjusted | $\chi^2$<br>p value | OR (95% CI)<br>adjusted for<br>parental factors <sup>2</sup> | Logistic<br>regression<br>p value |
|---------------------------|--------------------------------------------------------|-----------------|----------------|---------------------------|---------------------|--------------------------------------------------------------|-----------------------------------|
| <b>CBCL</b>               |                                                        |                 |                |                           |                     |                                                              |                                   |
| Withdrawn                 | 3.0/4.0                                                | 13 (10)         | 8 (6)          | 1.6 (0.7 to 4)            | 0.3                 | 1.5 (0.6 to 4)                                               | 0.4                               |
| Somatic complaints        | 3.0/3.8                                                | 10 (8)          | 8 (6)          | 1.2 (0.5 to 3)            | 0.6                 | 1.2 (0.5 to 3)                                               | 0.7                               |
| Anxious/ depressed        | 5.1/8.8                                                | 23 (18)         | 11 (9)         | 2.3 (1.1 to 5)            | 0.03                | 2.3 (1.1 to 5)                                               | 0.04                              |
| Social problems           | 2.0/4.0                                                | 33 (25)         | 8 (6)          | 5.1 (2.3 to 12)           | 0.001               | 4.6 (2 to 11)                                                | 0.001                             |
| Thought problems          | 1.0/0.8                                                | 9 (7)           | 3 (2)          | 3.1 (0.8 to 12)           | 0.08                | 3.1 (0.8 to 13)                                              | 0.08                              |
| Attention problems        | 6.0/4.0                                                | 33 (25)         | 8 (6)          | 5.1 (2.2 to 12)           | 0.001               | 4.3 (1.9 to 10)                                              | 0.001                             |
| Delinquent behaviour      | 3.0/2.0                                                | 16 (12)         | 6 (5)          | 2.8 (1.1 to 7.5)          | 0.03                | 1.6 (0.7 to 4)                                               | 0.3                               |
| Aggressive behaviour      | 12/9.6                                                 | 16 (12)         | 10 (8)         | 1.7 (0.7 to 4)            | 0.2                 | 1.6 (1.1 to 7)                                               | 0.6                               |
| ASDI                      | 35/34                                                  | 33 (26)         | 18 (14)        | 2.3 (1.1 to 4)            | 0.01                | 2.0 (0.9 to 4)                                               | 0.06                              |
| <b>YCI</b>                |                                                        |                 |                |                           |                     |                                                              |                                   |
| Attention                 | 21/19                                                  | 32 (25)         | 9 (7)          | 4.4 (2.0 to 10)           | 0.0001              | 3.4 (1.5 to 8)                                               | 0.003                             |
| Adaptability              | 10/9                                                   | 33 (26)         | 8 (6)          | 5.2 (2.3 to 12)           | 0.0001              | 5.2 (2.3 to 12)                                              | 0.0001                            |
| Impulsivity               | 14/12                                                  | 34 (27)         | 9 (7)          | 4.3 (2.0 to 9)            | 0.0001              | 4.1 (1.9 to 8)                                               | 0.0001                            |
| Activity                  | 6/5                                                    | 17 (13)         | 8 (6)          | 2.3 (1.0 to 5)            | 0.06                | 2.1 (0.9 to 5)                                               | 0.09                              |
| <b>TRF</b>                |                                                        |                 |                |                           |                     |                                                              |                                   |
| Withdrawn                 | 2.6/3.4                                                | 19 (17)         | 8 (7)          | 2.5 (1 to 6)              | 0.03                | 2.3 (0.9 to 7)                                               | 0.07                              |
| Somatic complaints        | 1.6/2.0                                                | 7 (10)          | 4 (4)          | 2.8 (0.8 to 9)            | 0.07                | 2.6 (0.7 to 11)                                              | 0.13                              |
| Anxious/ depressed        | 7.6/6.0                                                | 19 (17)         | 8 (7)          | 2.6 (1.1 to 6)            | 0.03                | 2.4 (0.9 to 6)                                               | 0.07                              |
| Social problems           | 4.0/4.0                                                | 29 (26)         | 7 (7)          | 5.1 (2.1 to 12)           | 0.001               | 4.1 (1.7 to 10)                                              | 0.02                              |
| Thought problems          | 0/ 0.4                                                 | 24 (22)         | 9 (8)          | 3.0 (1.3 to 6.9)          | 0.006               | 2.3 (0.9 to 6)                                               | 0.06                              |

|                                    |           |         |        |                  |        |                 |        |
|------------------------------------|-----------|---------|--------|------------------|--------|-----------------|--------|
| Attention problems                 | 19.6/10.4 | 23 (21) | 9 (8)  | 2.9 (1.2 to 7)   | 0.009  | 2.3 (1.0 to 5)  | 0.05   |
| Delinquent behaviour               | 2.6/0.0   | 27 (24) | 8 (7)  | 4.0 (1.7 to 9)   | 0.001  | 4.0 (1.6 to 11) | 0.02   |
| Aggressive behaviour               | 14.0/9.4  | 19 (17) | 9 (8)  | 2.3 (1.0 to 5)   | 0.05   | 1.8 (0.8 to 4)  | 0.18   |
| CAS                                |           |         |        |                  |        |                 |        |
| School                             | 2.0/2.8   | 22 (17) | 6 (5)  | 4.4 (1.7 to 11)  | 0.01   | 3.5 (1.3 to 9)  | 0.01   |
| Friends                            | 1.0/1.0   | 7 (6)   | 7 (6)  | 1.0 (0.4 to 3.0) | 0.98   | 1.0 (0.3 to 3)  | 0.96   |
| Activities                         | 0.0/0.0   | 18 (14) | 5 (4)  | 4.0 (1.4 to 11)  | 0.005  | 5.2 (1.5 to 19) | 0.01   |
| Family                             | 3.0/3.0   | 17 (14) | 8 (6)  | 2.3 (1.0 to 6)   | 0.048  | 2.3 (0.9 to 6)  | 0.08   |
| Fear-worries                       | 2.0/3.0   | 7 (6)   | 5 (4)  | 1.5 (0.5 to 5)   | 0.5    | 1.8 (0.5 to 7)  | 0.35   |
| Anxiety                            | 2.2/3.0   | 20 (16) | 9 (7)  | 2.5 (1.1 to 6)   | 0.03   | 2.4 (1.1 to 6)  | 0.05   |
| Self-esteem                        | 2.0/3.0   | 17 (14) | 6 (5)  | 3.1 (1.2 to 8)   | 0.01   | 3.2 (1.1 to 9)  | 0.03   |
| Behaviour – mood                   | 0.0/0.0   | 19 (15) | 11 (8) | 2.1 (0.9 to 4.8) | 0.07   | 1.9 (0.8 to 4)  | 0.13   |
| Somatic complaints                 | 2.0/2.8   | 12 (10) | 7 (6)  | 1.8 (0.7 to 5)   | 0.2    | 1.5 (0.6 to 4)  | 0.4    |
| Aggressive behaviour               | 2.0/1.0   | 27 (22) | 10 (8) | 3.2 (1.5 to 7)   | 0.002  | 3.1 (1.4 to 7)  | 0.005  |
| Thought problems                   | 0.0/0.0   | 4 (3)   | 0      |                  |        |                 |        |
| Abnormal                           |           |         |        |                  |        |                 |        |
| Total Problem Score <sup>3,4</sup> | 4.0/4.0   | 40 (40) | 7 (7)  | 8,4 (3.5 to 20)  | 0.0001 | 8.2 (3.1 to 25) | 0.0001 |

Odds ratios (OR) are presented crude, and adjusted for confounding parental factors.

<sup>1</sup> Score higher than 90 percentile for controls of same sex.

<sup>2</sup> Adjusted for paternal education, maternal education, childrearing practice (nurturance), smoke in pregnancy.

<sup>3</sup> 14/41 VLBW vs 26/61 LBW (>1500g) had abnormal Total Problem Score (OR: 1,3, 95% CI 0,6 to 2,9, p=0.54).

<sup>4</sup> OR adjusted for parental factors and child IQ, OR: 7,9, 95% CI 3,0 to 23, p=0.0001.
